# Supplementary material
Source: publisher figshare collection journal article supplement (https://acs.figshare.com/ndownloader/files/5105677)
Supplement: Supplementary file 1 [file 5105677]

*Organic Letters*

*Supplementary Information for*

**Conformationally Imprinted Receptors: Atropisomers with ‘Write’, ‘Save’ and  
‘Erase’ Recognition Properties**

*Authors:*

*Charles F. Degenhardt III, Judith M. Lavin, Mark D. Smith Ken D. Shimizu\**

Department of Chemistry and Biochemistry, University of South Carolina,  
Columbia, SC 29208 Fax: (803)777-9521; Tel: (803)777-6523  
E-mail: [shimizu@mail.chem.sc.edu](mailto:shimizu@mail.chem.sc.edu)

**1) General Experimental:**

NMR spectra were recorded on a Varian 300 MHz spectrometer. Chemical shifts are reported in ppm ( $\delta$ ) referenced to TMS ( $\delta$  0.00 ppm) in  $^1\text{H}$  NMR. All chemicals were purchased from commercial suppliers and used as received unless otherwise specified. Diacid **1** was synthesized and the *syn*- and *anti*-atropisomers were separated and isolated by column chromatography as previously described.<sup>1</sup> Flash chromatography was performed using silica (Sorbent Technologies, silica gel 60 Å, 200-400 mesh). HPLC was performed using a Varian Prostar HPLC model 210 equipped with a Varian Prostar UV-Vis detector model 320, and a Rainin Dynamax 60 Å silica column. UV detection was performed at 254 nm.

**2) Ethyl adenine-9-acetate and *Syn* Diacid Co-crystallization:**

An equimolar ratio of *syn*-diacid **1** and EA9A in acetonitrile was slowly evaporated from a septum covered test tube containing a ventilation needle. Crystals appeared in 4-7 days.

**3) Titration Study:**

Aliquots of the diacid **1** (3 mM) in  $\text{CD}_3\text{CN}$  were added to a 600  $\mu\text{L}$  1 mM solution of EA9A in  $\text{CD}_3\text{CN}$ . A spectrum was taken after each addition of diacid **1** and the EA9A amine protons were followed.

**4) Control Studies:**

Solutions were of *anti*-**1** (5 mM) and 20 mM of either 1,4-diazabicyclo[2.2.2]octane (DABCO) or *N*-acyl-2-aminopyridine. The solutions were transferred to NMR tubes, and each was heated at 90 °C for 21 h. The resulting ratio of *syn*- and *anti*-**1** was monitored by HPLC (Rainin Dynamax 60 Å silica gel column with 35% HOAc and 65% CHCl<sub>3</sub> as the mobile phase at a flow rate of 1.0 mL/min). A second control study was performed in which a 5 mM solution of *anti* diacid was heated to 90 °C in the presence of 15 mM EA9A in DMSO.

---

<sup>1</sup> Degenhardt, C., III; Shortell, D. B.; Adams, R. D.; Shimizu, K. D. *Chem. Comm.* **2000**, 929-930.
